# Supplementary material for: Lipid crystallization: from self-assembly to hierarchical and biological ordering
Source: Royal Society of Chemistry journal article supplement (doi:10.1039/c2nr31465g), 2012-01-01
Supplement: c2nr31465g.pdf [file c2nr31465g.pdf]

# Lipid Crystallization: From Self Assembly to Hierarchical and Biological Ordering.

Chandrashekhar V. Kulkarni\*

---

## Lipid Databases

- LIPIDAG is a database of lipid miscibility and associated information  
<http://www.lipidat.chemistry.ohio-state.edu/lipidag/homeLIPIDAG.asp>
- LIPIDAT is a database of thermodynamic and associated information on lipid mesophase and crystal polymorphic transitions.  
<http://www.lipidat.chemistry.ohio-state.edu/>
- Database of the lipid classification scheme.  
<http://www.lipidmaps.org/>
- Database about the molecular structure of lipids  
[http://www.lipidat.chemistry.ohio-tate.edu/cis888/rehner/searchLMSD\\_2\\_4.asp](http://www.lipidat.chemistry.ohio-tate.edu/cis888/rehner/searchLMSD_2_4.asp)
- Lipid-database, produced by the *International Medical Center of Japan* and the *Japan Science and Technology Agency*.  
<http://lipidbank.jp/>
- A general summary of the chemistry, occurrence, composition and biology of these essential and fascinating natural compounds.  
<http://www.lipidlibrary.co.uk/index.html>  
<http://lipidlibrary.aocs.org/index.html>

- A general database focusing the chemistry of lipids. Some more lipid related sites are listed on this website

<http://www.cyberlipid.org/index.htm>

- A knowledge base managed within the EU Framework 7 project "LipidomicNet"

[http://www.lipidomicnet.org/index.php/Main\\_Page](http://www.lipidomicnet.org/index.php/Main_Page)

- The European Lipidomics Initiative

<http://www.lipidomics.net/>

- An index of lipid phase diagrams is provided in this article with cross references.

(Koynova and Caffrey 2002)

[Koynova, R. and M. Caffrey \(2002\). "An index of lipid phase diagrams."](#)

[Chemistry and Physics of Lipids 115\(1-2\): 107-219.](#)
